# Supplementary material
Source: publisher figshare collection journal article supplement (https://tandf.figshare.com/articles/dataset/_/11770905)
Supplement: Supplementary file 4 [file 2]

Archive with 5 entries (5 files):
- tent_a_1723709_sm2525.docx
- tent_a_1723709_sm2524.pdf
- tent_a_1723709_sm2523.pdf
- tent_a_1723709_sm2522.pdf
- tent_a_1723709_sm2521.pdf
