# Supplementary material
Source: publisher figshare collection journal article supplement (https://tandf.figshare.com/articles/dataset/_/11770905)
Supplement: Supplementary file 4 [file 2 › tent_a_1723709_sm2525.docx]

Supplementary Table 1

Numbers of sequences analyzed, OTU richness (Chao1), Shannon diversity index, and Good’s coverage.

| Samples | Raw reads | Removed (a) | Effective | Norm(b)  Reads | Norm(b)  OTUs | Norm(b)  Chao1 | Norm(b)  Shannon | Norm(b)  Good’s (%) |
| --- | --- | --- | --- | --- | --- | --- | --- | --- |
| S1 |  |  |  |  |  |  |  |  |
| S1_D15 | 45518 | 27066 | 18452 | 5127 | 128 | 144.15 | 3.20 | 99.01 |
| S1_D30 | 72796 | 37572 | 35224 | 5127 | 137 | 172.20 | 3.11 | 99.26 |
| S2 |  |  |  |  |  |  |  |  |
| S2_D0 | 58088 | 36597 | 21491 | 5127 | 199 | 224.20 | 3.79 | 98.51 |
| S2_D15 | 27724 | 17362 | 10362 | 5127 | 143 | 164.75 | 3.28 | 98.58 |
| S2_D30 | 44252 | 25472 | 18780 | 5127 | 128 | 170.27 | 3.10 | 98.96 |
| S3 |  |  |  |  |  |  |  |  |
| S3_D0_1f | 23634 | 13623 | 10011 | 5127 | 177 | 198.37 | 3.48 | 98.04 |
| S3_D15_1f | 44840 | 26482 | 18358 | 5127 | 182 | 202.67 | 3.40 | 98.35 |
| S3_D30_1f | 30545 | 17831 | 12714 | 5127 | 158 | 175.55 | 3.36 | 98.37 |
| S3_D0_1r | 47936 | 31626 | 16310 | 5127 | 190 | 219.25 | 3.61 | 98.18 |
| S3_D15_1r | 15069 | 9942 | 5127 | 5127 | 111 | 119.55 | 3.42 | 98.55 |
| S3_D30_1r | 49022 | 30357 | 18665 | 5127 | 166 | 178.00 | 3.76 | 98.41 |
| S4 |  |  |  |  |  |  |  |  |
| S4_D15_1f | 53465 | 32212 | 21253 | 5127 | 187 | 224.19 | 3.61 | 98.51 |
| S4_D30_1f | 39321 | 22085 | 17236 | 5127 | 152 | 177.00 | 3.46 | 98.66 |
| S4_D15_1r | 35576 | 21118 | 14458 | 5127 | 159 | 192.68 | 3.36 | 98.64 |
| S4_D30_1r | 52877 | 32728 | 20149 | 5127 | 146 | 158.35 | 3.28 | 98.70 |
| (a) Low-quality reads and chimaera | | | | | | | | |
| (b) Normalized | | | | | | | | |
