# Supplementary material
Source: publisher figshare collection journal article supplement (https://tandf.figshare.com/articles/dataset/_/11770905)

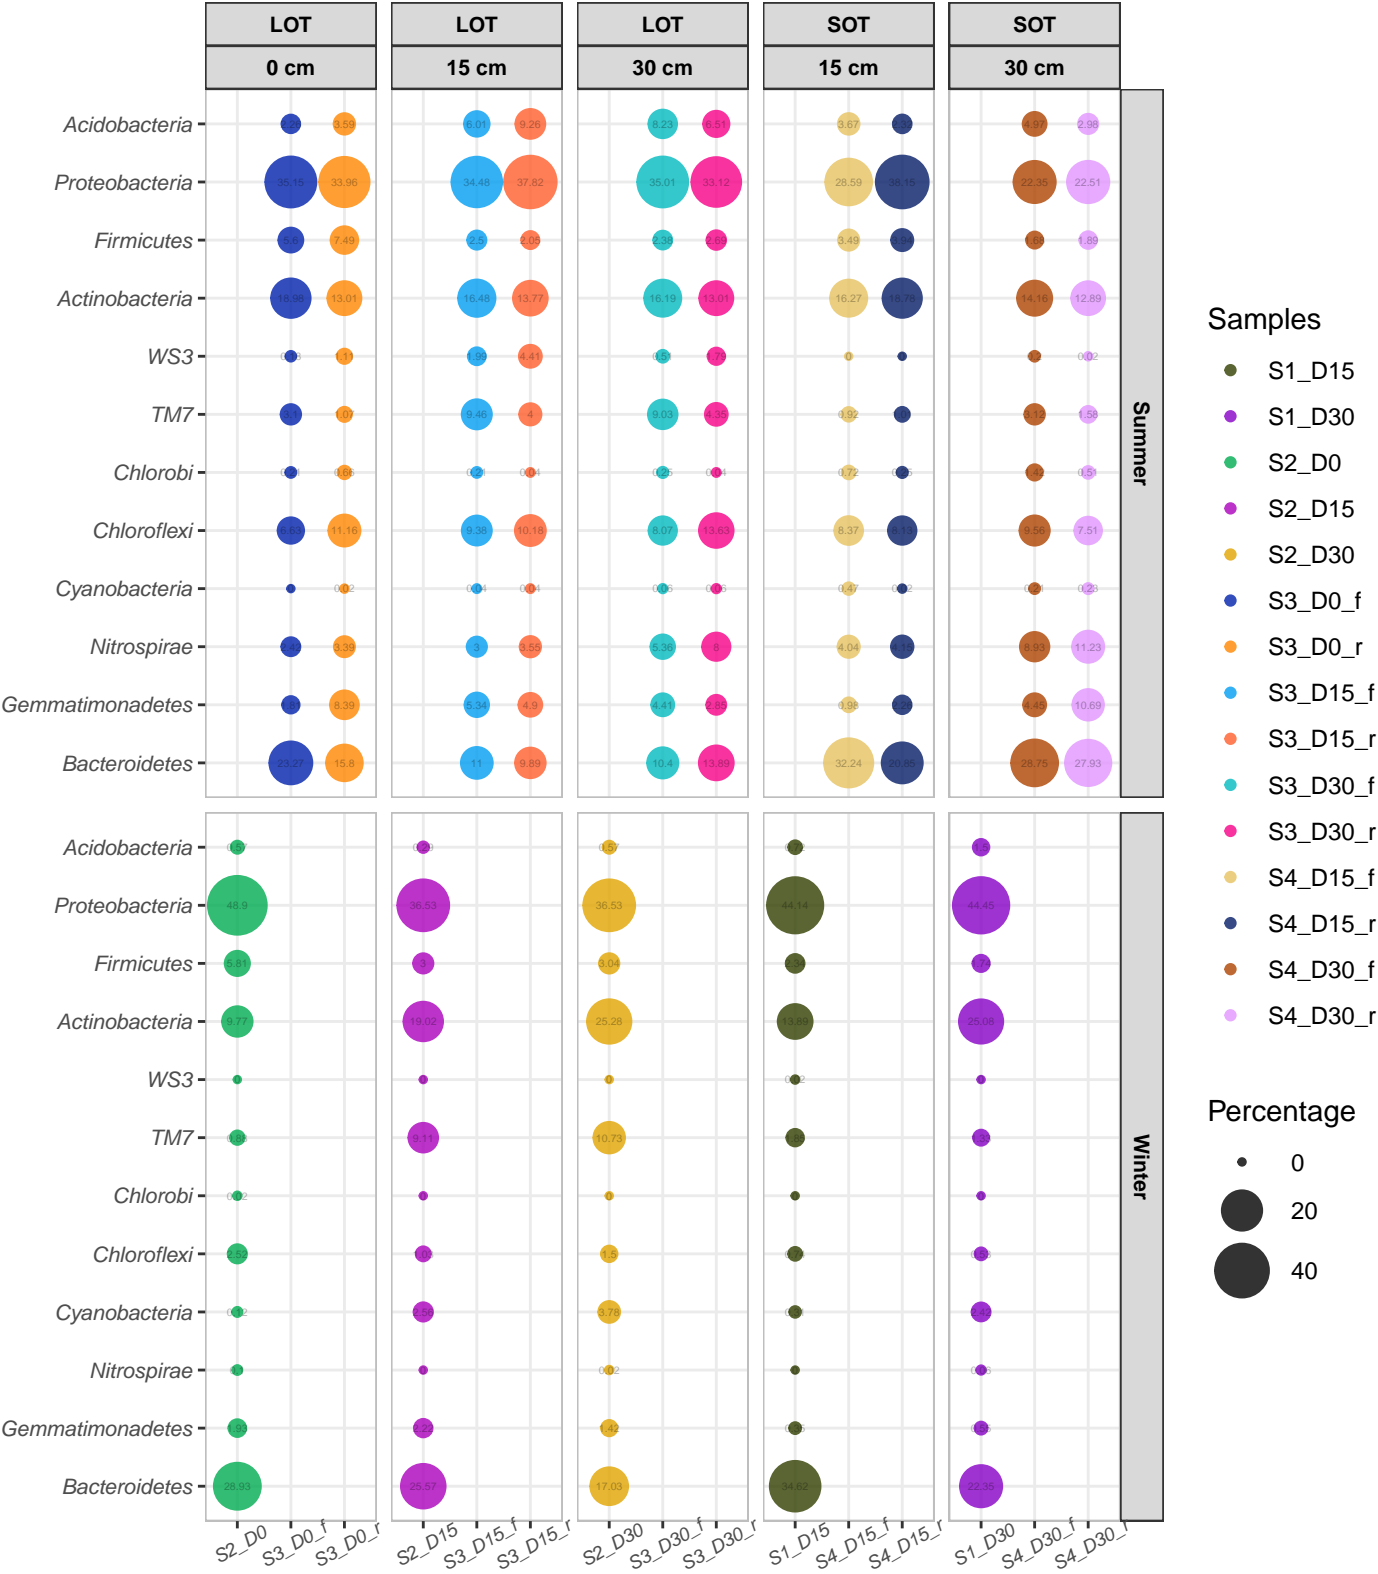

Supplement: Supplementary file 1 [file 2]

# Samples

S1\_D15  
 S1\_D30  
 S2\_D0  
 S2\_D15  
 S2\_D30  
 S3\_D0\_f  
 S3\_D0\_r  
 S3\_D15\_f  
 S3\_D15\_r  
 S3\_D30\_f  
 S3\_D30\_r  
 S4\_D15\_f  
 S4\_D15\_r  
 S4\_D30\_f  
 S4\_D30\_r

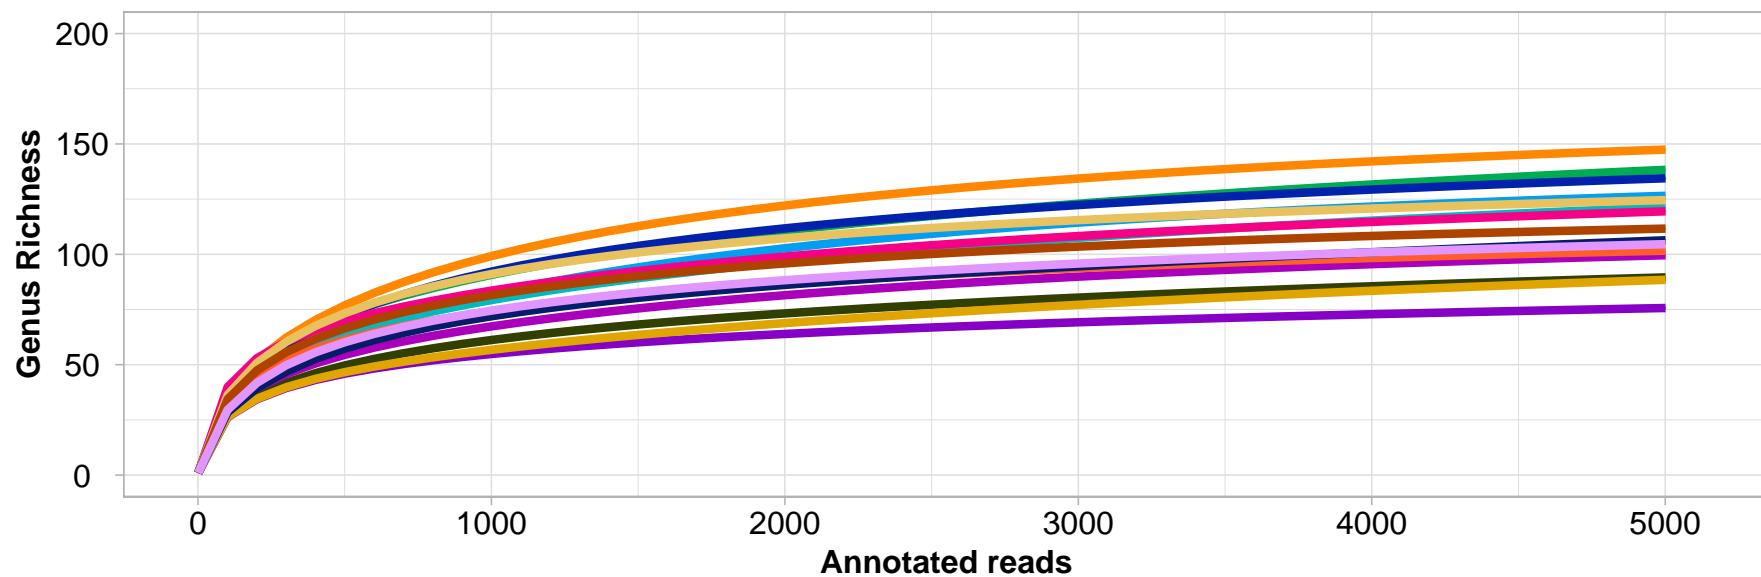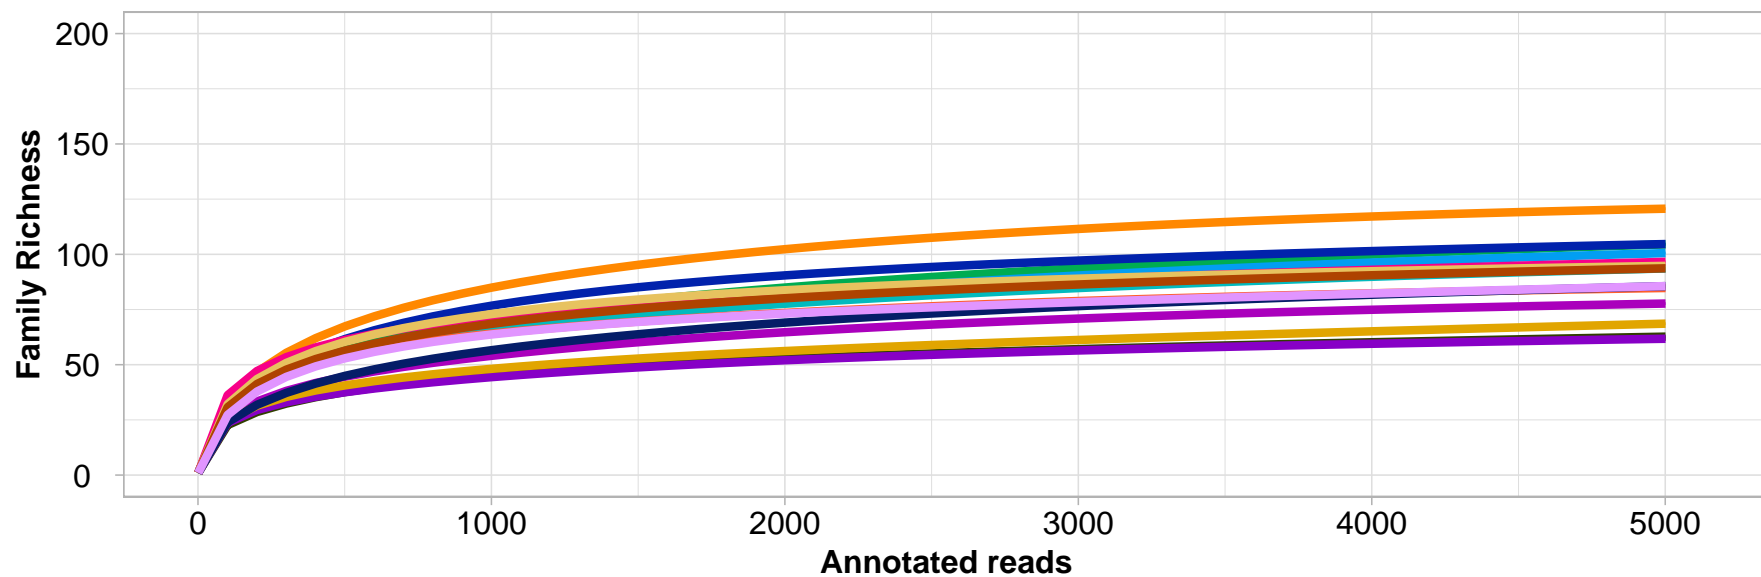

Supplement: Supplementary file 2 [file 2]

# Sampling characteristics and molecular analyses

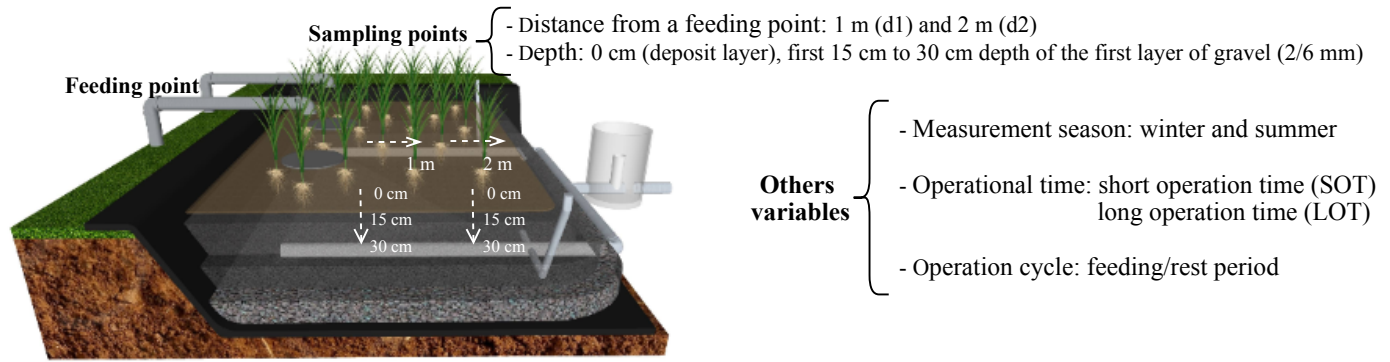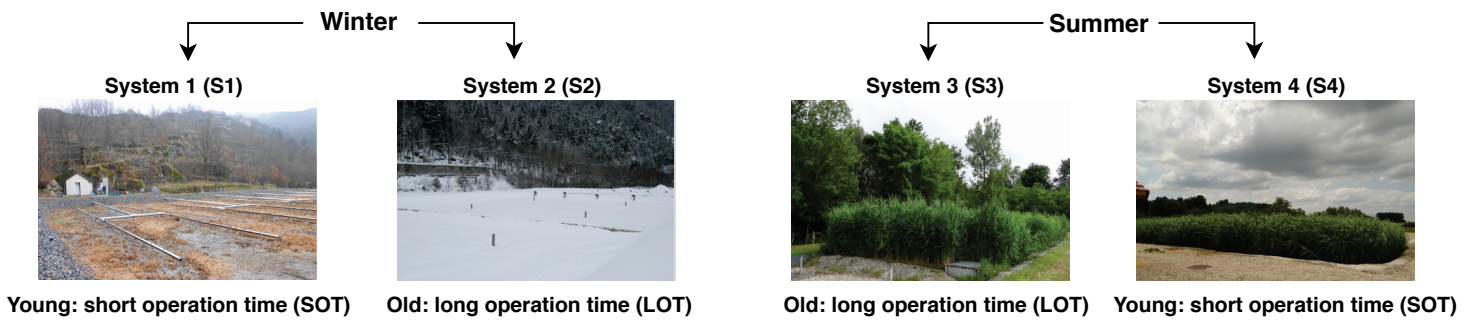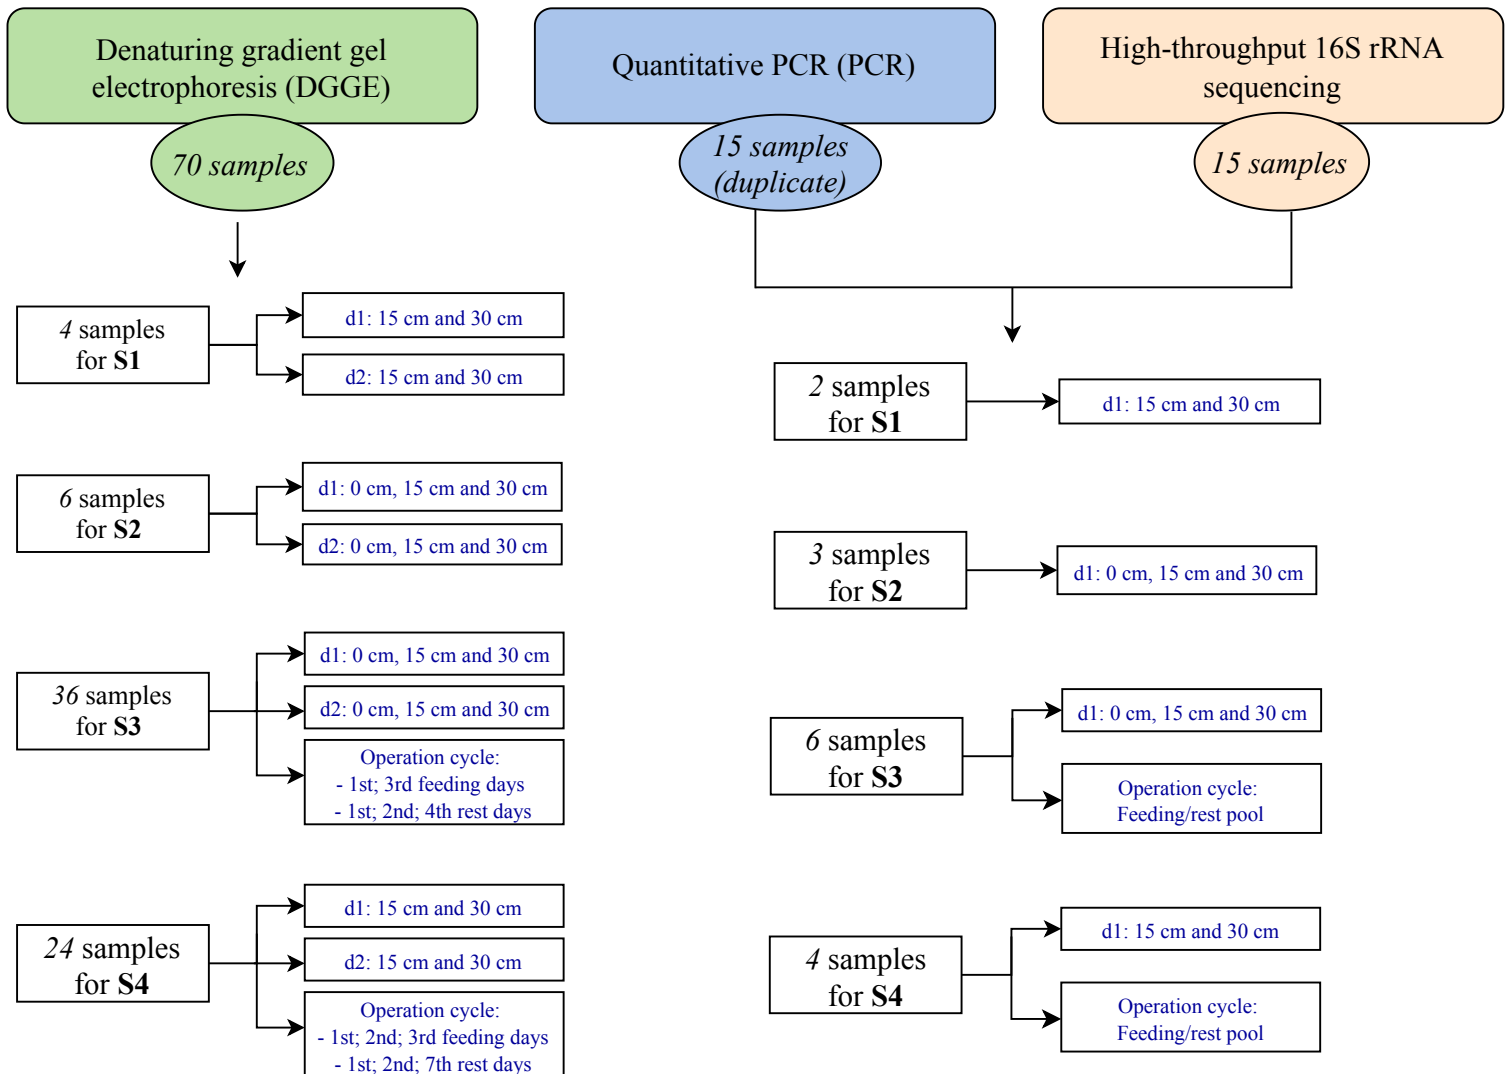

Supplement: Supplementary file 3 [file 2]

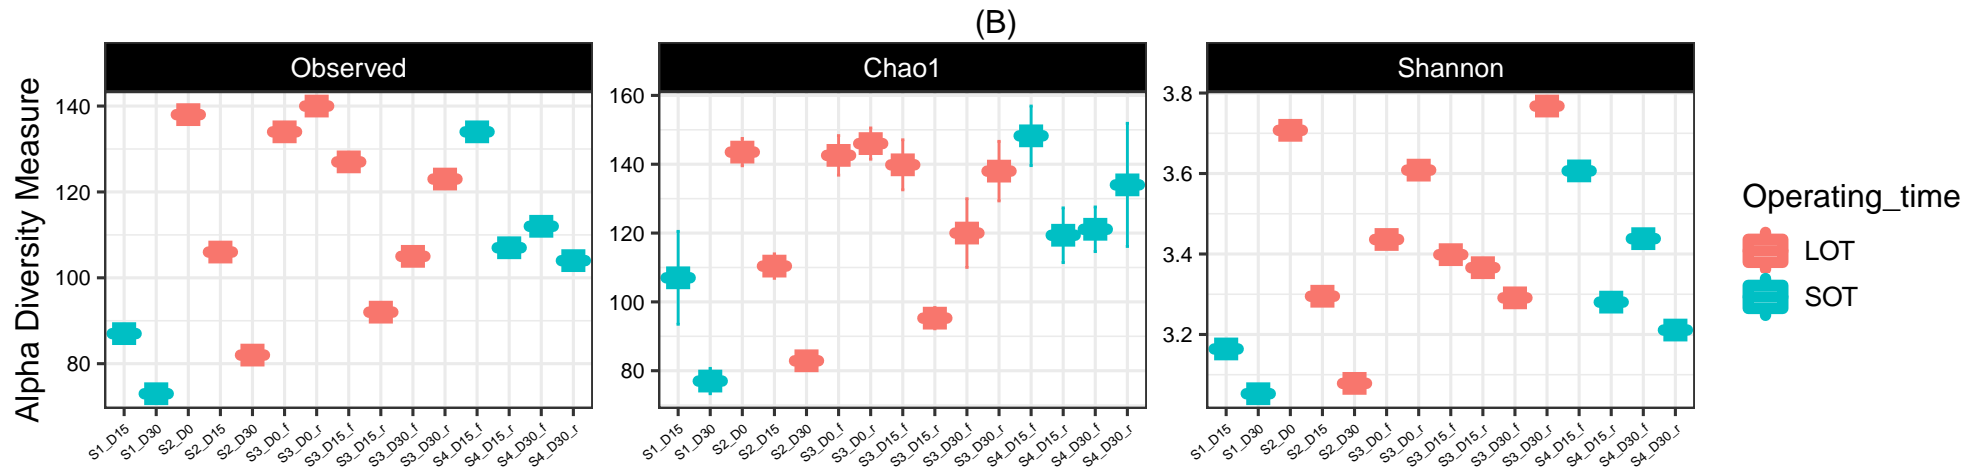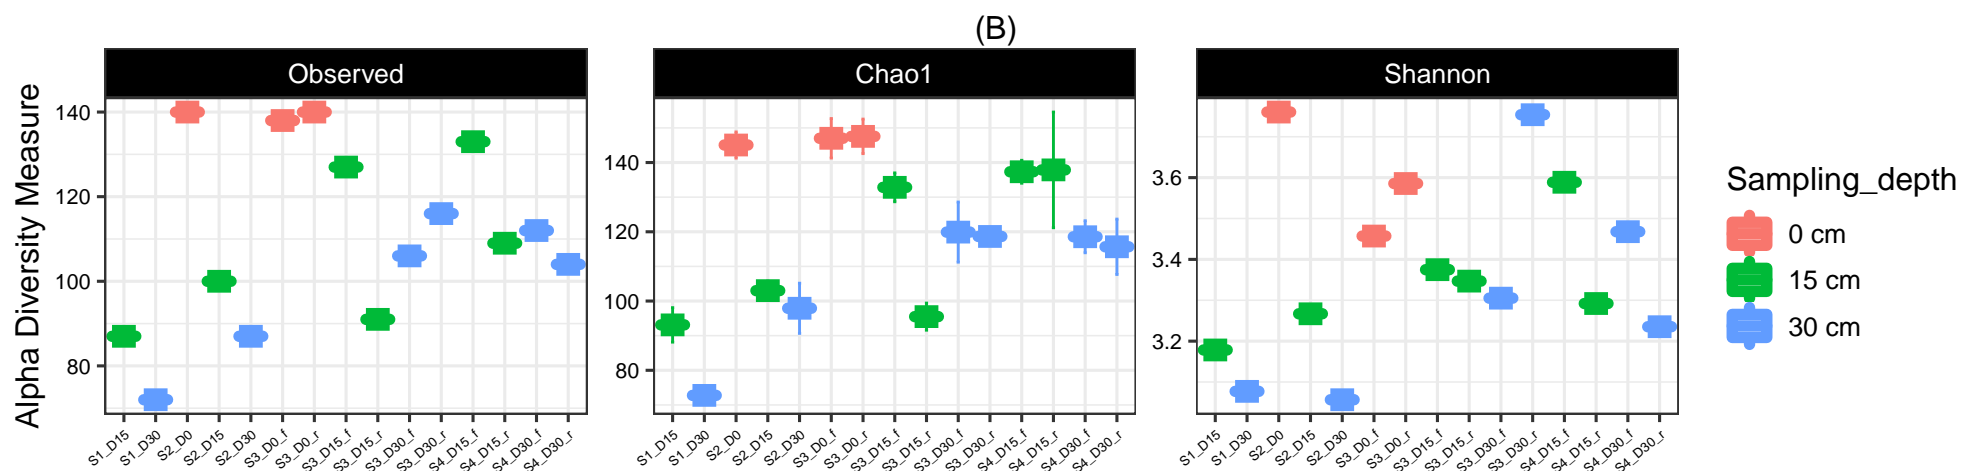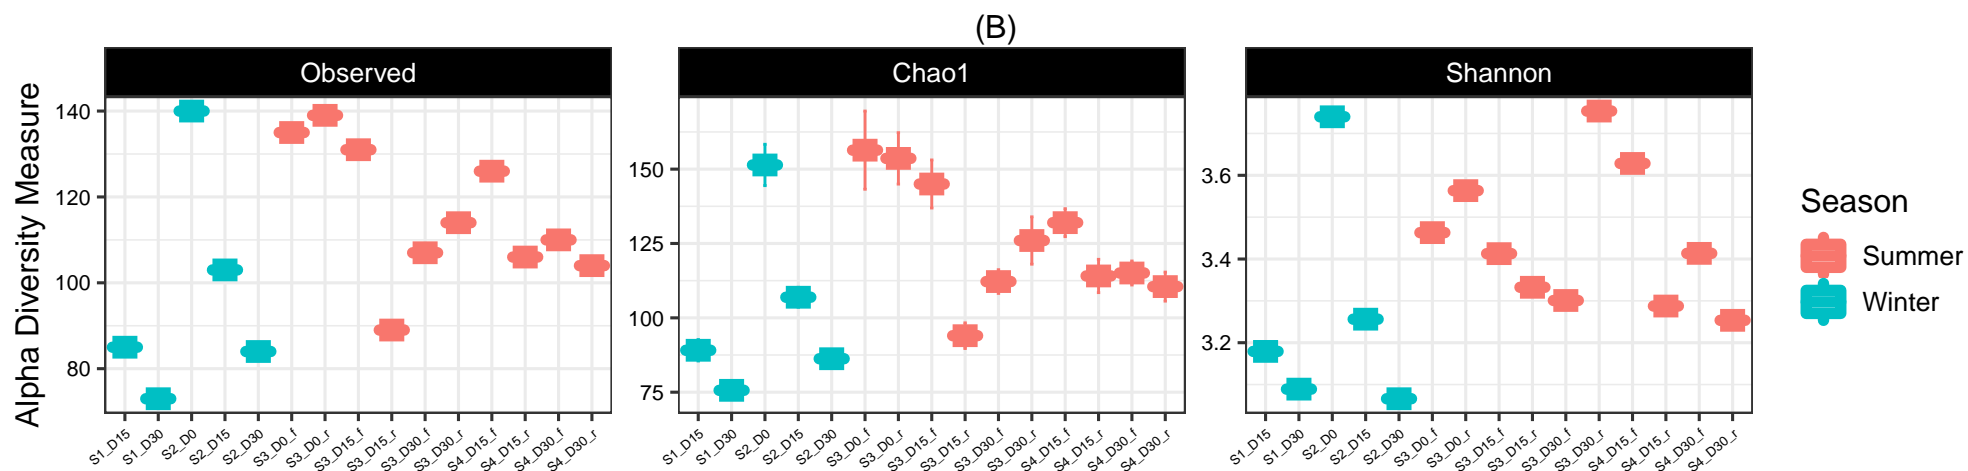

Supplement: Supplementary file 4 [file 2 › tent_a_1723709_sm2522.pdf]
